# Supplementary material for: Comparison of solvent extraction and thermal desorption methods for determination of volatile polyfluorinated alkyl substances in the urban atmosphere
Source: Royal Society of Chemistry journal article supplement (doi:10.1039/c3ay40089a), 2013-01-01
Supplement: c3ay40089a.pdf [file c3ay40089a.pdf]

## Electronic Supplementary Information

### Comparison of solvent extraction and thermal desorption methods for determination of volatile polyfluorinated alkyl substances in the urban atmosphere

Yaoxing Wu<sup>a</sup>, Victor W.-C. Chang<sup>\*a</sup>

<sup>a</sup> School of Civil and Environmental Engineering, Nanyang Technological University, 50 Nanyang Avenue, 639798 Singapore.

wcchang@ntu.edu.sg

#### Table of Content

---

|                                    |    |
|------------------------------------|----|
| 1.- Isotopically labeled standards | S2 |
| 2.- GC-MS parameters               | S3 |

## 1. Isotopically labeled standards

Table A1. Analytes, acronyms, purity, and vendor information of isotopically labeled standards.

| Analyte                                                                                               | Acronym                                                  | Purity | Vendor                             |
|-------------------------------------------------------------------------------------------------------|----------------------------------------------------------|--------|------------------------------------|
| 2-perfluorobutyl-[1,1,2,2- <sup>2</sup> H <sub>4</sub> ]-ethanol                                      | d <sub>4</sub> -4:2 FTOH                                 | > 98%  | Wellington Laboratories,<br>Canada |
| 2-perfluorohexyl-[1,1- <sup>2</sup> H <sub>2</sub> ]-[1,2- <sup>13</sup> C <sub>2</sub> ]-<br>ethanol | <sup>13</sup> C <sub>2</sub> , d <sub>2</sub> -6:2 FTOH  | > 98%  | Wellington Laboratories,<br>Canada |
| 2-perfluorooctyl-[1,1- <sup>2</sup> H <sub>2</sub> ]-[1,2- <sup>13</sup> C <sub>2</sub> ]-<br>ethanol | <sup>13</sup> C <sub>2</sub> , d <sub>2</sub> -8:2 FTOH  | > 98%  | Wellington Laboratories,<br>Canada |
| 2-perfluorodecyl-[1,1- <sup>2</sup> H <sub>2</sub> ]-[1,2- <sup>13</sup> C <sub>2</sub> ]-<br>ethanol | <sup>13</sup> C <sub>2</sub> , d <sub>2</sub> -10:2 FTOH | > 98%  | Wellington Laboratories,<br>Canada |
| N-methyl-d <sub>3</sub> -perfluoro-1-<br>octanesulfonamide                                            | d <sub>3</sub> -NMeFOSA                                  | > 98%  | Wellington Laboratories,<br>Canada |
| N-ethyl-d <sub>5</sub> -perfluoro-1-octanesulfonamide                                                 | d <sub>5</sub> -NEtFOSA                                  | > 98%  | Wellington Laboratories,<br>Canada |

## 2. GC–MS parameters

Table A2. Retention times (on a 60 meter HP-INNOWAX column), molecular weights, and ions monitored for GC–MS analysis of targeted PFASs in PCI mode.

| Analyte                                                               | Retention time (min) | Molecular weight | PCI Ions monitored m/z      |
|-----------------------------------------------------------------------|----------------------|------------------|-----------------------------|
| 4:2 FTOH                                                              | 13.6                 | 264              | 227, 265 <sup>a</sup>       |
| 6:2 FTOH                                                              | 15.5                 | 364              | 327, 365 <sup>a</sup> , 393 |
| 8:2 FTOH                                                              | 17.3                 | 464              | 427, 465 <sup>a</sup> , 493 |
| 10:2 FTOH                                                             | 18.7                 | 564              | 527, 565 <sup>a</sup> , 593 |
| NMeFOSA                                                               | 24.5                 | 513              | 514 <sup>a</sup>            |
| NEtFOSA                                                               | 23.8                 | 527              | 528 <sup>a</sup>            |
| NMeFOSE                                                               | 26                   | 557              | 540 <sup>a</sup> , 558      |
| NEtFOSE                                                               | 26.1                 | 571              | 554 <sup>a</sup> , 572      |
| d <sub>4</sub> -4:2 FTOH <sup>b</sup>                                 | 13.3                 | 268              | 230, 269 <sup>a</sup>       |
| <sup>13</sup> C <sub>2</sub> , d <sub>2</sub> -6:2 FTOH <sup>b</sup>  | 15.4                 | 368              | 331, 369 <sup>a</sup> , 397 |
| <sup>13</sup> C <sub>2</sub> , d <sub>2</sub> -8:2 FTOH <sup>b</sup>  | 17.2                 | 468              | 431, 469 <sup>a</sup> , 496 |
| <sup>13</sup> C <sub>2</sub> , d <sub>2</sub> -10:2 FTOH <sup>b</sup> | 18.8                 | 568              | 531, 569 <sup>a</sup> , 597 |
| d <sub>3</sub> -NMeFOSA <sup>b</sup>                                  | 24.4                 | 516              | 517 <sup>a</sup>            |
| d <sub>5</sub> -NEtFOSA <sup>b</sup>                                  | 23.7                 | 532              | 533 <sup>a</sup>            |
| 7:1 FA <sup>c</sup>                                                   | 16.6                 | 400              | 381, 401                    |
| 11:1 FA <sup>c</sup>                                                  | 19.6                 | 600              | 581, 601                    |

<sup>a</sup> Quantification Ion

<sup>b</sup> Mass-labeled Surrogate Standard

<sup>c</sup> Internal Standard
